# Supplementary material
Source: PubMed Central journal article supplement (PMC4279248)
Supplement: NIHMS569299-supplement-01.pdf [file NIHMS569299-supplement-01.pdf]

**Supplementary Table (online only). Exclusion criteria**

|                                  | No. | %   |
|----------------------------------|-----|-----|
| Total EVARs performed            | 127 | 100 |
| Complexity and anatomy exclusion | 71  | 56  |
| Multiple manufacturer exclusion  | 9   | 7   |
| Non-Medicare exclusion           | 13  | 10  |
| Non-DRG 238 exclusion            | 15  | 12  |

DRG, Diagnosis-related group; EVAR, endovascular aneurysm repair.

The net cohort of 49 patients reflects the combination of all inclusion/exclusion percentages from the total sample. Several cases had more than one exclusion criteria.
